# Supplementary material for: Limits and CO 2 equilibration of near-coast alkalinity enhancement
Source: Copernicus journal article supplement (doi:10.5194/bg-20-27-2023), 2023-01-03
Supplement: Supplementary file 1 [file bg-20-27-2023-supplement.pdf]

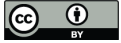

*Supplement of*

## **Limits and CO<sub>2</sub> equilibration of near-coast alkalinity enhancement**

**Jing He and Michael D. Tyka**

*Correspondence to:* Michael D. Tyka (mike.tyka@gmail.com)

The copyright of individual parts of the supplement might differ from the article licence.

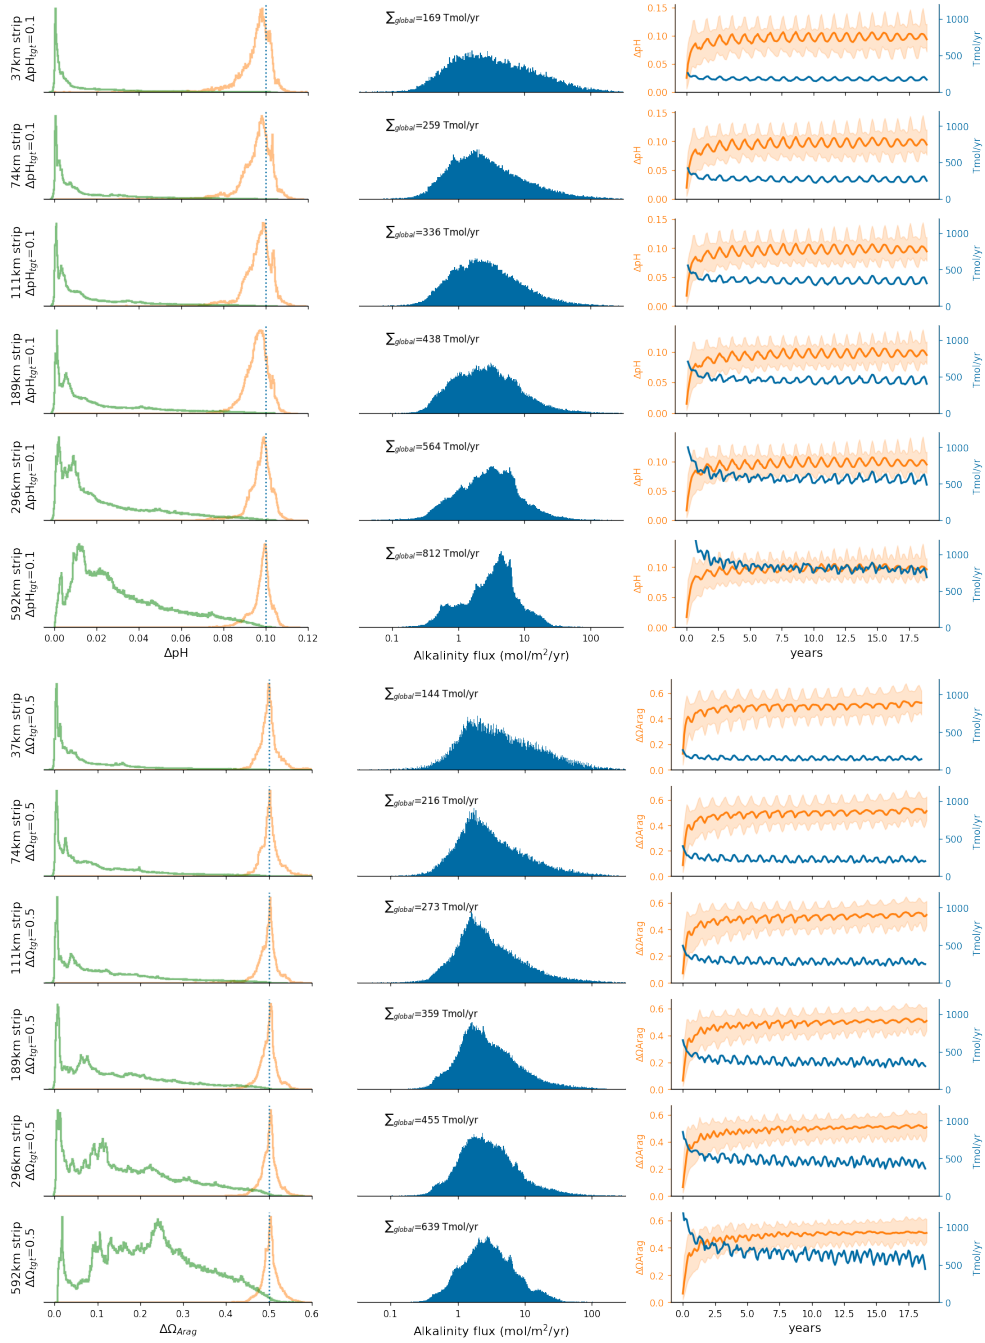

**Figure S1.** The left column shows normalized histograms of the annually averaged  $\Delta\text{pH}$  or  $\Delta\Omega_{Arag}$  over all grid points in the injection strip (orange) or outside the strip (green). The dotted vertical line indicates the respective target constraint. The middle column shows the distribution of the sustained alkalinity flux in the injection grid points. Note the x-axis is log-scaled, showing that injection flux spans  $>2$  orders of magnitude. The total global injection rate is shown above the histogram. The right column shows the total global alkalinity addition rate (summed over all grid points in the coastal strip) in blue and median pH change from the reference simulation (exclusively over grid points in the strip) in orange. The shading shows the 10th and 90th percentile range. The addition rate and pH change stabilize after 5 years.

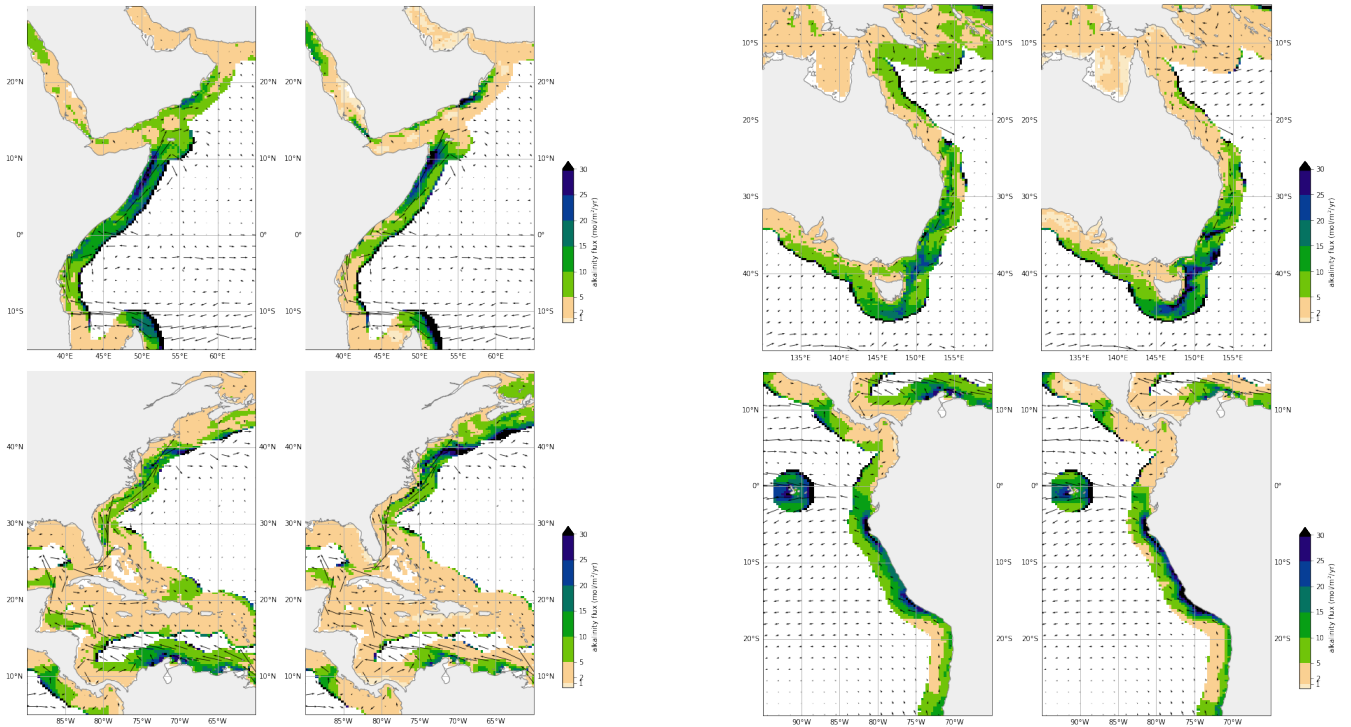

**Figure S2.** Comparison of injection patterns using a pH constraint  $\Delta\text{pH}_{tgt}=0.1$  (left) or a carbonate saturation constraint  $\Delta\Omega_{tgt}=0.5$  (right) for four different regions.

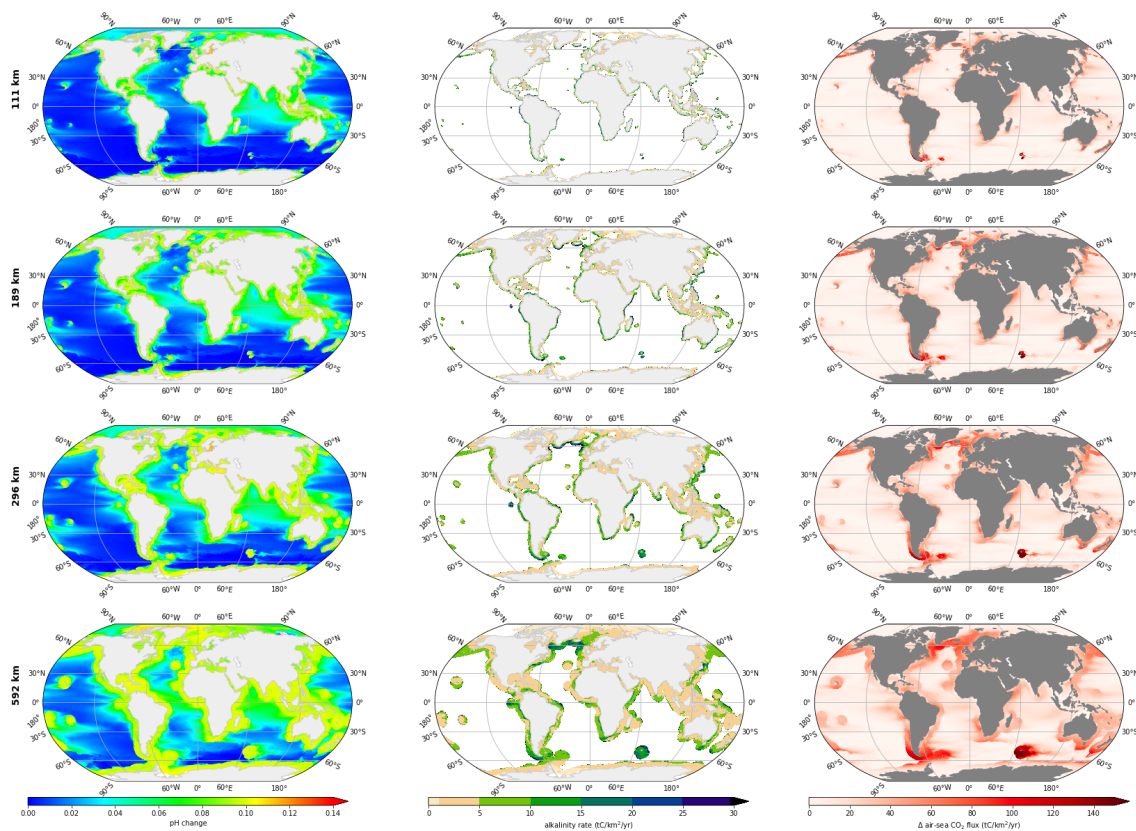

**Figure S3.** Mean pH change (left column) and alkalinity addition rate (middle column) for different strip widths. The pH change and alkalinity addition rate is averaged from years 5-20 in the simulation. Strip widths of 37 km and 74 km are not shown since they are too thin to see clearly in the global figures. Right column shows change in mean  $\text{CO}_2$  flux relative to the reference simulation.

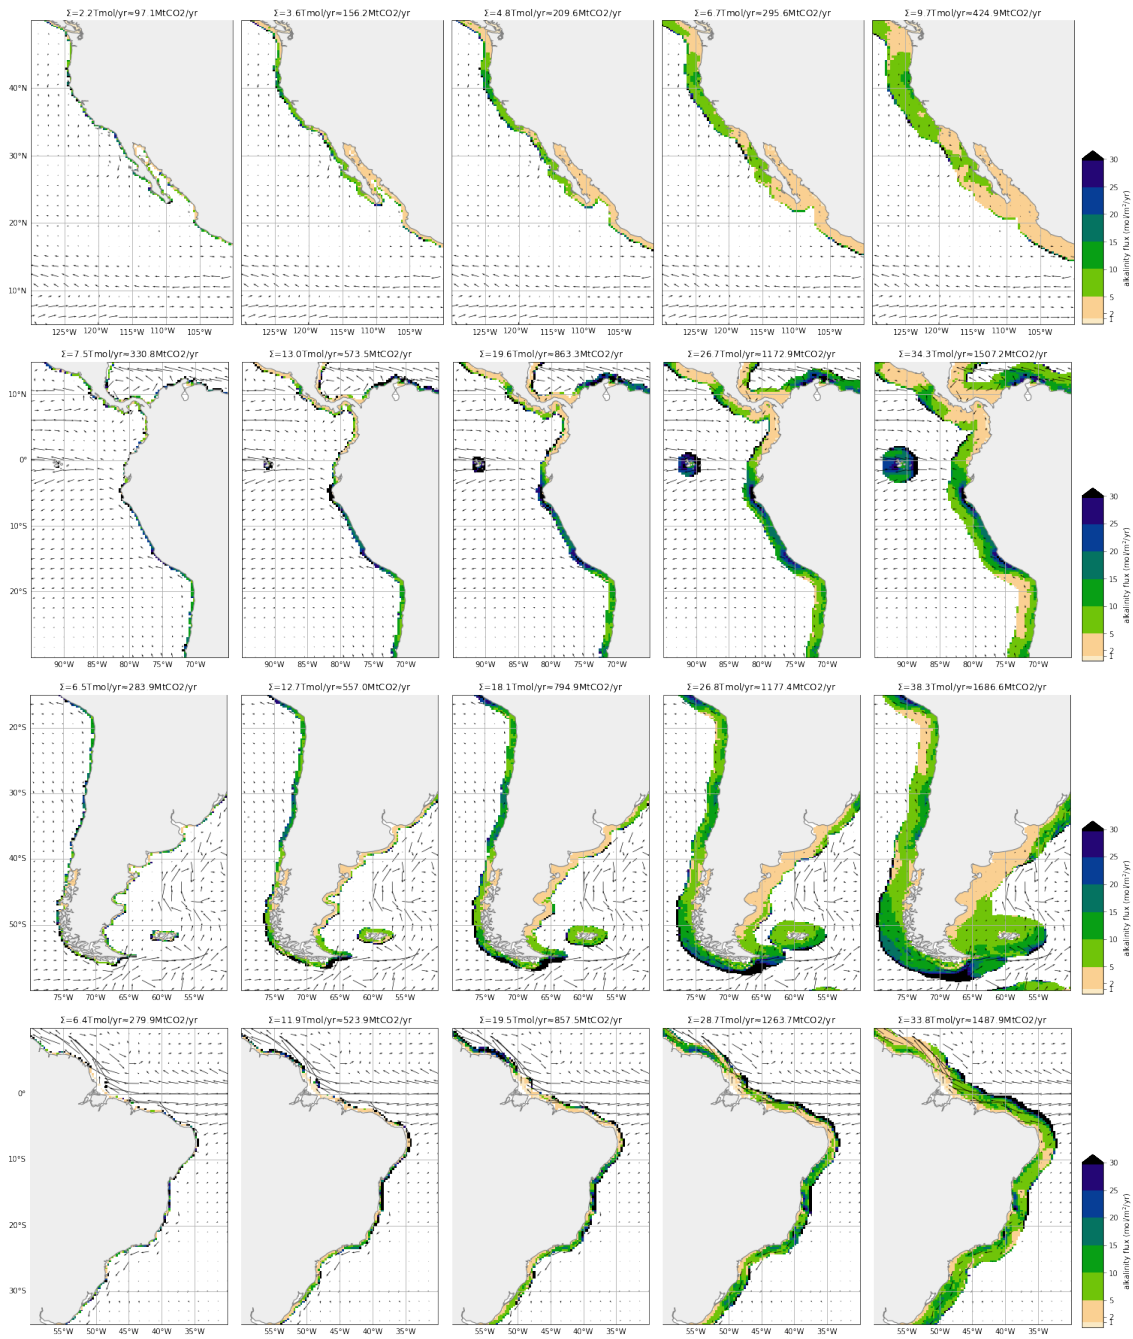

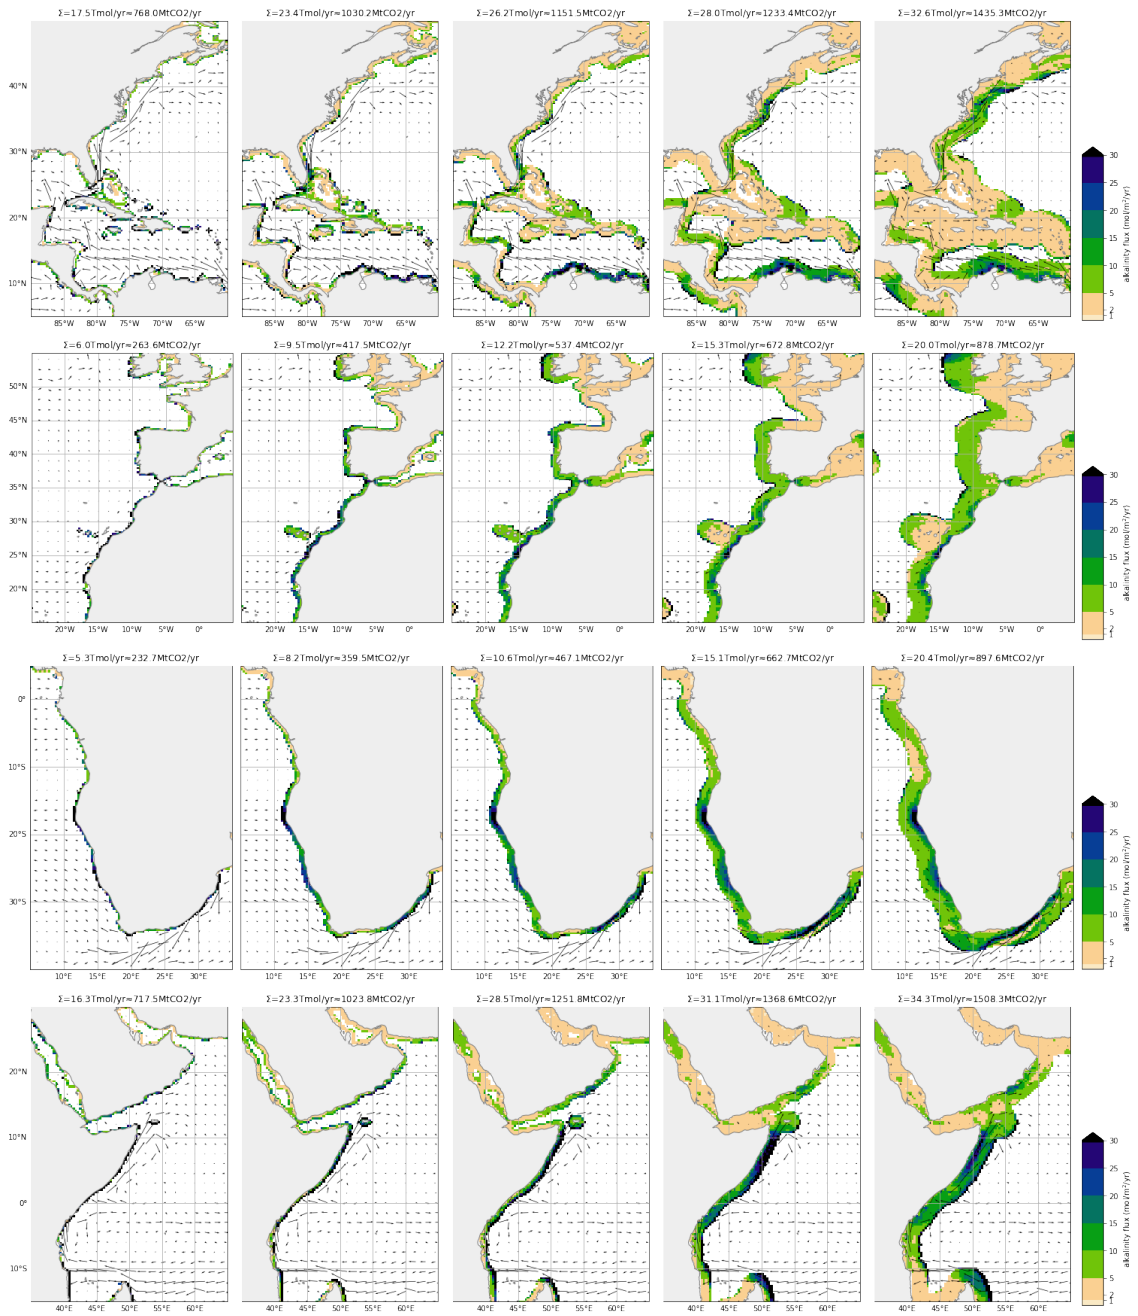

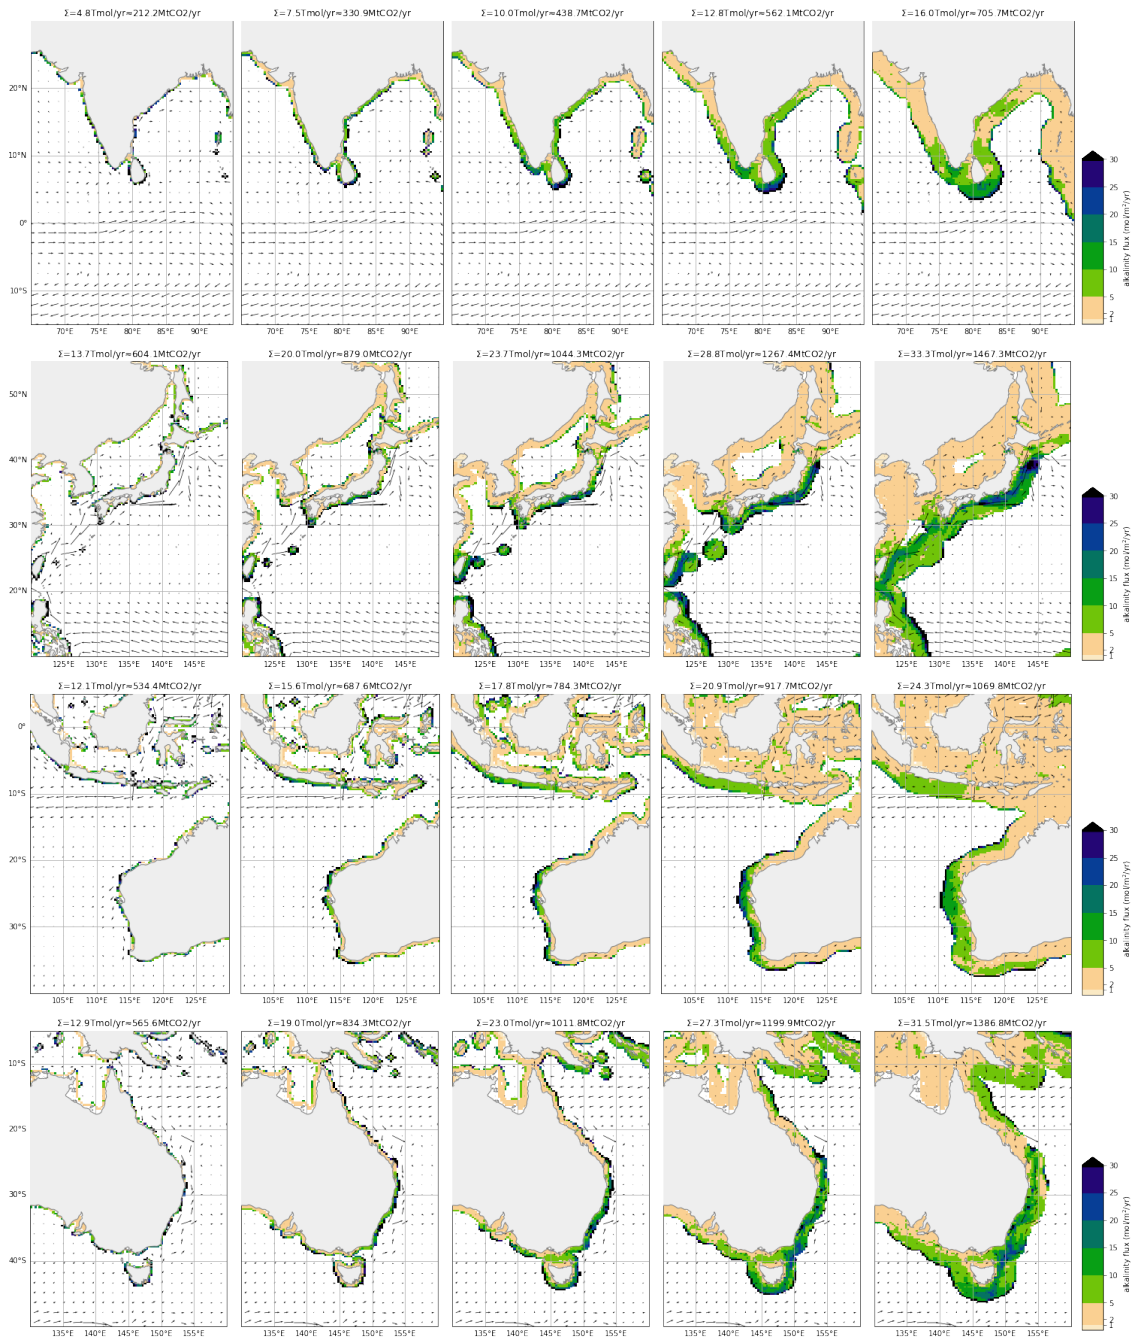

**Figure S4.** Detailed regional plots showing alkalinity fluxes, spanning the majority of coastlines. The total injection rate (in Tmol/yr) is indicated above each panel. The conversion into approximate negative emissions (in MtCO<sub>2</sub>/yr) assumes an uptake efficiency of 0.8. The panels cover most major coastlines running top to bottom from the Pacific Northwest down the west coast of the Americas, up the east coast of the Americas, Europe, West coast of Africa, East Coast of Africa, India, and finally Japan and Australia.

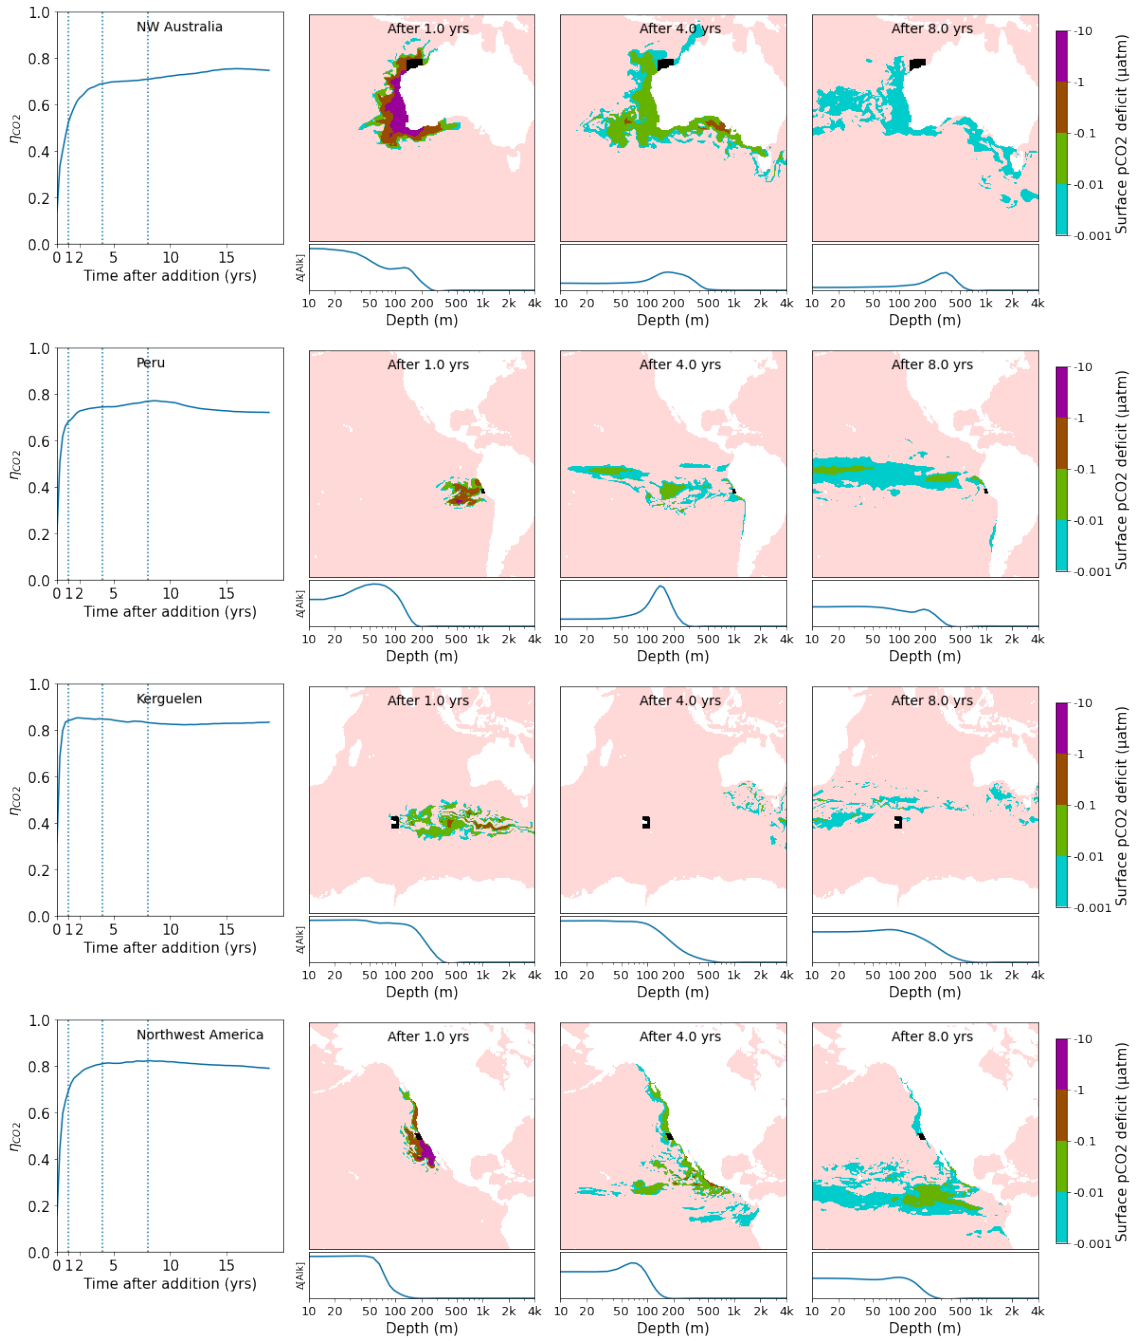

10



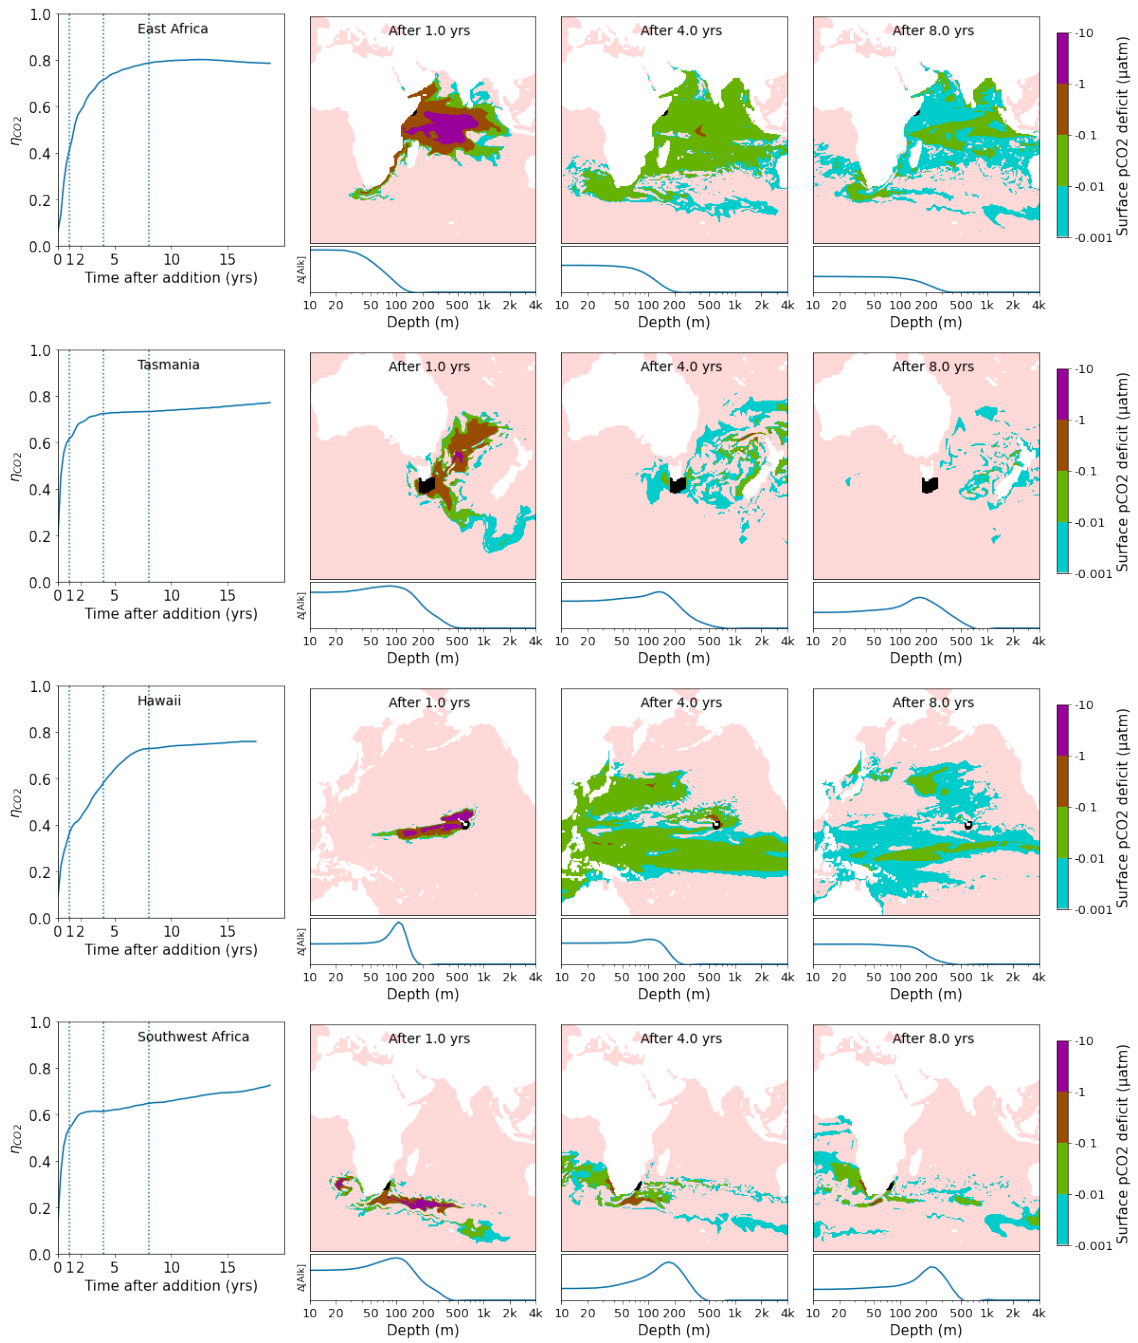

15

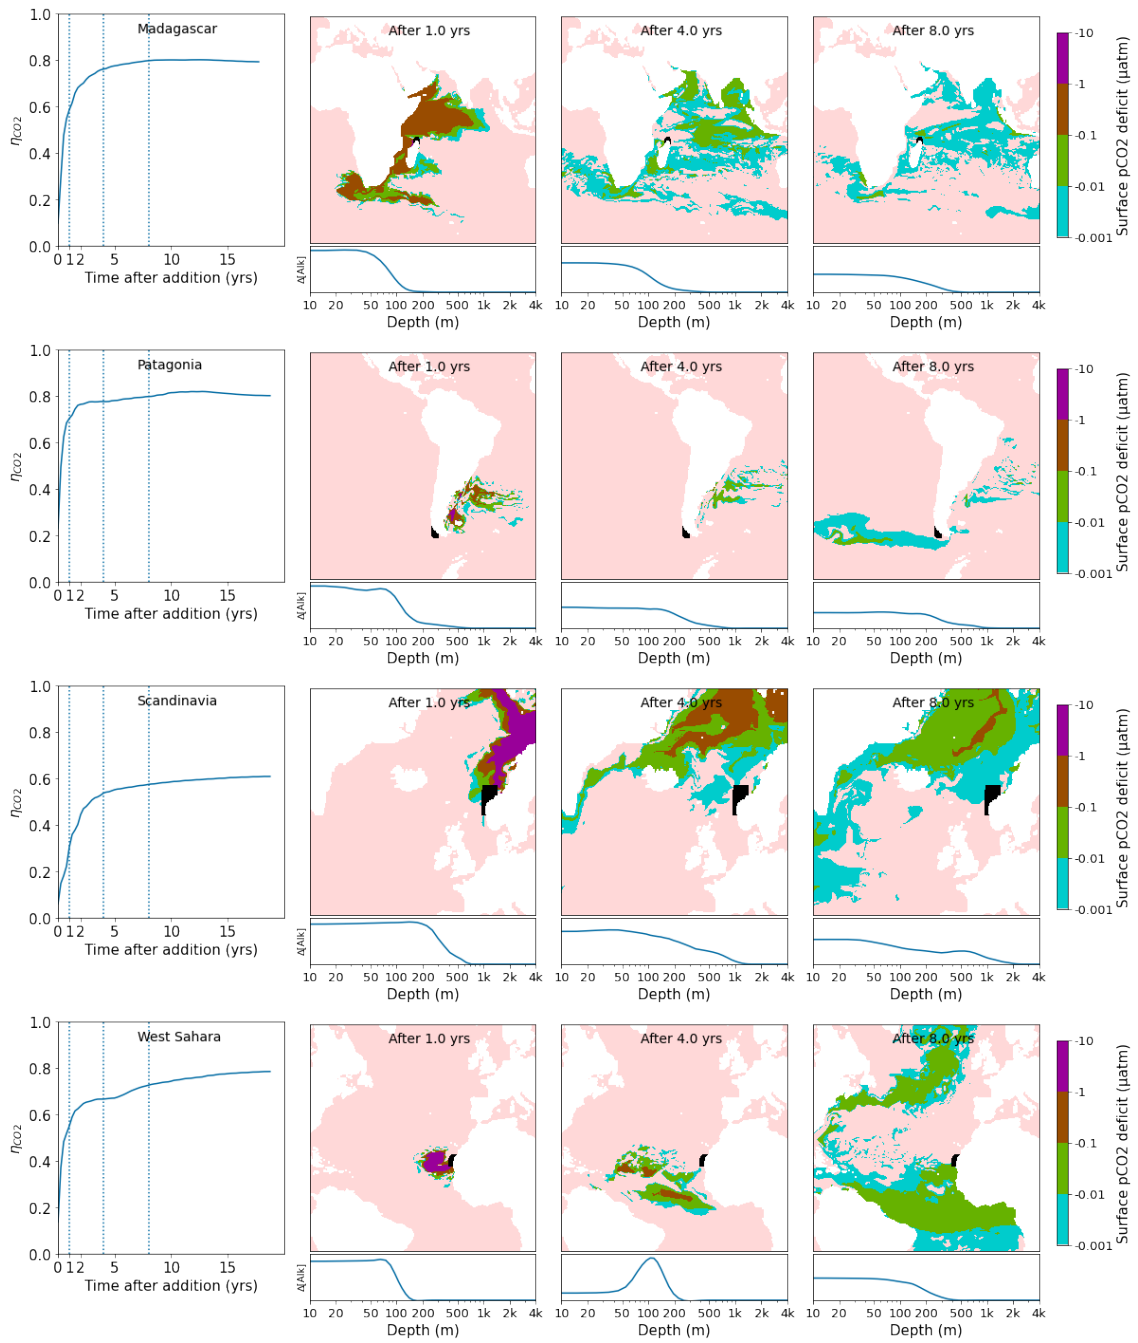

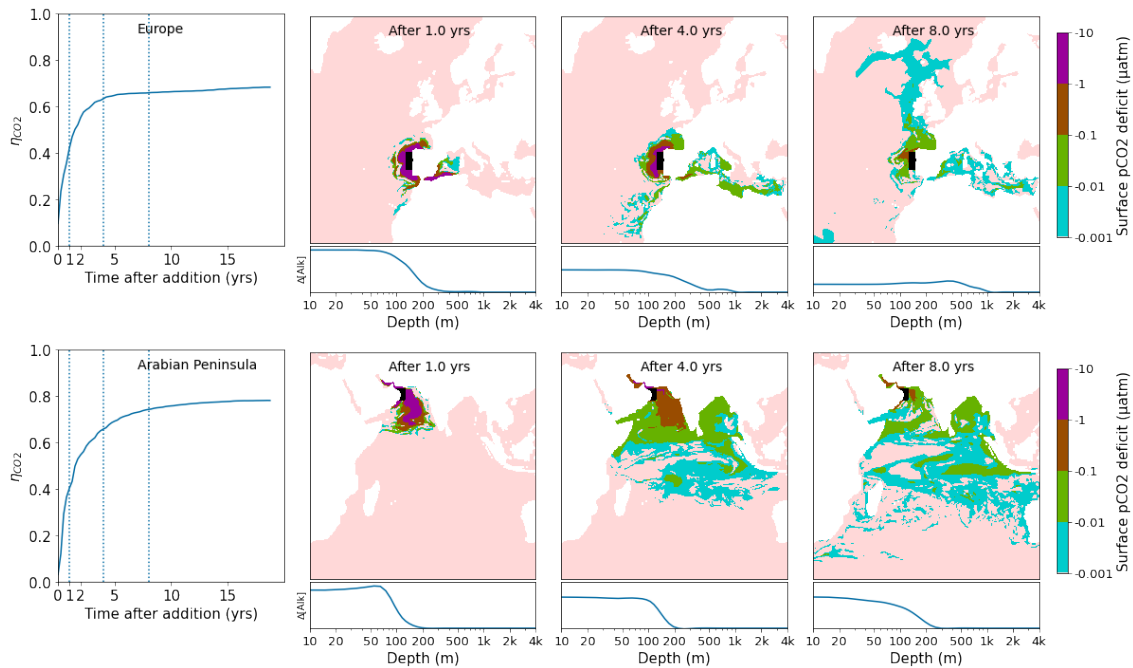

**Figure S5.** Pulse additions of alkalinity in additional locations. Due to computational constraints only a small number of pulse locations could be explored. The locations were chosen as examples, coarsely distributed along all major coastlines, in order to find and demonstrate the breadth of possible CO<sub>2</sub> uptake kinetics.
